# Supplementary material for: Evidence for the critical role of transmembrane helices 1 and 7 in substrate transport by human P-glycoprotein (ABCB1)
Source: PubMed Central journal article supplement (PMC6161881; doi:10.1371/journal.pone.0204693), 2018-09-28
Supplement: pone.0204693.s001.pdf [file pone.0204693.s001.pdf]

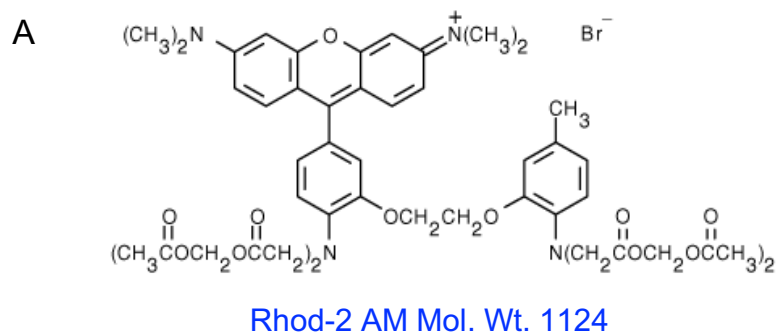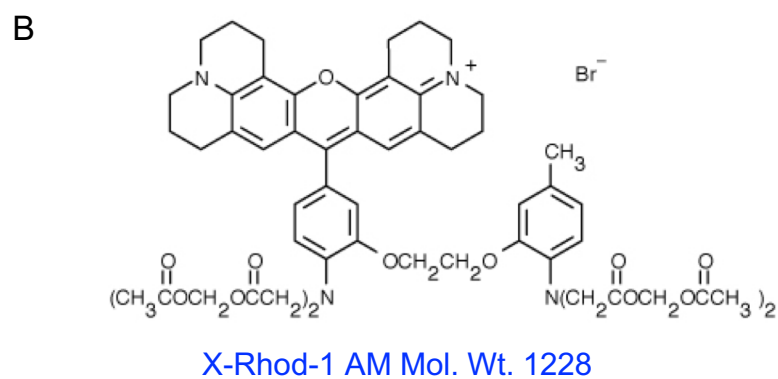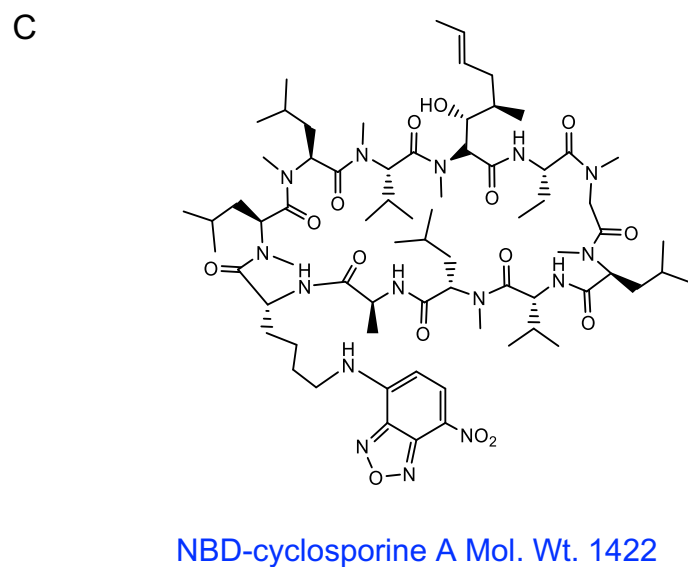

**S1 Figure. The chemical structures of transported substrates by TMH1,7 mutant P-gp.** Chemical structures and molecular weights of the substrates that are transported by TMH1,7 mutant P-gp. (A) Rhod-2-AM, (B) X-Rhod-1-AM and (C) NBD-cyclosporine A.
